# Supplementary material for: CircSLC8A1 inhibits sunitinib resistance in renal cell carcinoma by promoting the ubiquitination and degradation of FUS
Source: Research Square preprint supplement (doi:10.21203/rs.3.rs-1360067/v1), 2022-02-17
Supplement: Supplementary file 1 [file 57e94d944088ff844aa32c0d.xlsx]

## Sheet: StarBase
RBP	circRNA ID	GeneName	clipExpNum	clusterNum	clipIDnum
ADAR	hsa_circ_0000994	SLC8A1	1	1	1
CSTF2T	hsa_circ_0000994	SLC8A1	1	1	1
DGCR8	hsa_circ_0000994	SLC8A1	2	2	3
ELAVL3	hsa_circ_0000994	SLC8A1	1	3	3
FMR1	hsa_circ_0000994	SLC8A1	1	3	3
FUS	hsa_circ_0000994	SLC8A1	3	9	11
IGF2BP2	hsa_circ_0000994	SLC8A1	2	5	6
LIN28	hsa_circ_0000994	SLC8A1	1	2	2
MBNL2	hsa_circ_0000994	SLC8A1	4	8	10
MOV10	hsa_circ_0000994	SLC8A1	3	8	10
SRSF1	hsa_circ_0000994	SLC8A1	1	1	1
TAF15	hsa_circ_0000994	SLC8A1	5	8	13
TARDBP	hsa_circ_0000994	SLC8A1	1	1	1

## Sheet: IDCSC
CircRNA ID	Start	End	Details	RBP
hsa_circ_0000994	40428498	40428667	SBDH463-145030	IGF2BP2
hsa_circ_0000994	40428500	40428520	human_RBP_CLIPdb_18181843;GSE40653,GSM998875	FUS
hsa_circ_0000994	40428575	40428603	SBDH64-58298	DGCR8
hsa_circ_0000994	40428600	40428620	human_RBP_CLIPdb_18181844;GSE40653,GSM998875	FUS
hsa_circ_0000994	40428601	40428635	human_RBP_CLIPdb_18181845;DRA001158,DRS012387	TARDBP
hsa_circ_0000994	40428620	40428640	human_RBP_CLIPdb_18181846;GSE68890,GSM1685419	MBNL2
hsa_circ_0000994	40428626	40428638	human_RBP_CLIPdb_18181847;GSE56010,GSM1350198	HNRNPC
hsa_circ_0000994	40428626	40428656	SBDH547-37209	LIN28
hsa_circ_0000994	40428657	40428658	human_RBP_CLIPdb_18181848;GSE78030,GSM2064708	YTHDC1
hsa_circ_0000994	40428661	40428663	SBDH409-35013	ELAVL3
hsa_circ_0000994	40428687	40428688	human_RBP_CLIPdb_18181849;GSE78030,GSM2064708	YTHDC1
hsa_circ_0000994	40428694	40428744	SBDH180-3233	AGO2
hsa_circ_0000994	40428700	40428720	human_RBP_CLIPdb_18181850;GSE40653,GSM998875	FUS
hsa_circ_0000994	40428702	40428737	SBDH112-148767	FUS
hsa_circ_0000994	40428702	40428754	SBDH173-16625	MOV10
hsa_circ_0000994	40428757	40428781	SBDH450-5661	MBNL2
hsa_circ_0000994	40428828	40428853	SBDH173-16626	MOV10
hsa_circ_0000994	40428841	40428876	SBDH15-12325	SRSF1
hsa_circ_0000994	40428914	40428937	SBDH107-31545	TAF15
hsa_circ_0000994	40428914	40428937	SBDH111-23285	TAF15
hsa_circ_0000994	40428914	40428937	SBDH114-213006	FUS
hsa_circ_0000994	40428914	40428938	SBDH108-89770	TAF15
hsa_circ_0000994	40428914	40428938	SBDH110-62070	TAF15
hsa_circ_0000994	40428941	40428994	SBDH173-16627	MOV10
hsa_circ_0000994	40428977	40429046	SBDH463-145031	IGF2BP2
hsa_circ_0000994	40428979	40429049	SBDH543-51824	FMR1
hsa_circ_0000994	40428988	40429004	SBDH113-191171	FUS
hsa_circ_0000994	40428988	40429020	SBDH111-23286	TAF15
hsa_circ_0000994	40428988	40429020	SBDH114-213007	FUS
hsa_circ_0000994	40429018	40429019	human_RBP_CLIPdb_18181851;GSE78030,GSM2064705	YTHDF1
hsa_circ_0000994	40429020	40429040	human_RBP_CLIPdb_18181852;GSE40653,GSM998875	FUS
hsa_circ_0000994	40429035	40429070	SBDH173-16628	MOV10
hsa_circ_0000994	40429080	40429081	human_RBP_CLIPdb_18181853;GSE78030,GSM2064706	YTHDF2
hsa_circ_0000994	40429095	40429150	SBDH547-37210	LIN28
hsa_circ_0000994	40429156	40429255	SBDH180-3234	AGO2
hsa_circ_0000994	40429175	40429178	SBDH409-35014	ELAVL3
hsa_circ_0000994	40429192	40429193	human_RBP_CLIPdb_18181854;GSE78030,GSM2064708	YTHDC1
hsa_circ_0000994	40429223	40429224	human_RBP_CLIPdb_18181855;GSE78030,GSM2064708	YTHDC1
hsa_circ_0000994	40429279	40429315	SBDH65-18891	DGCR8
hsa_circ_0000994	40429280	40429311	SBDH64-58299	DGCR8
hsa_circ_0000994	40429330	40429384	SBDH180-3235	AGO2
hsa_circ_0000994	40429350	40429394	SBDH114-213008	FUS
hsa_circ_0000994	40429364	40429365	SBDH517-43843	TARDBP
hsa_circ_0000994	40429396	40429441	SBDH173-16629	MOV10
hsa_circ_0000994	40429505	40429569	SBDH173-16630	MOV10
hsa_circ_0000994	40429520	40429540	human_RBP_CLIPdb_18181856;GSE78030,GSM2064708	YTHDC1
hsa_circ_0000994	40429520	40429540	human_RBP_CLIPdb_18181857;GSE40653,GSM998875	FUS
hsa_circ_0000994	40429529	40429545	SBDH447-4877	MBNL2
hsa_circ_0000994	40429535	40429544	SBDH444-4643	MBNL2
hsa_circ_0000994	40429536	40429548	SBDH450-5662	MBNL2
hsa_circ_0000994	40429545	40429568	SBDH179-651	MOV10
hsa_circ_0000994	40429545	40429569	SBDH178-650	MOV10
hsa_circ_0000994	40429546	40429549	SBDH441-6201	MBNL2
hsa_circ_0000994	40429559	40429561	SBDH409-35015	ELAVL3
hsa_circ_0000994	40429559	40429586	human_RBP_CLIPdb_18181858;DRA001158,DRS012387	TARDBP
hsa_circ_0000994	40429560	40429580	human_RBP_CLIPdb_18181859;GSE68890,GSM1685423	MBNL2
hsa_circ_0000994	40429587	40429594	SBDH447-4878	MBNL2
hsa_circ_0000994	40429617	40429618	human_RBP_CLIPdb_18181860;GSE78030,GSM2064708	YTHDC1
hsa_circ_0000994	40429627	40429694	SBDH561-34622	CSTF2T
hsa_circ_0000994	40429631	40429657	SBDH450-5663	MBNL2
hsa_circ_0000994	40429643	40429644	human_RBP_CLIPdb_18181861;GSE78030,GSM2064708	YTHDC1
hsa_circ_0000994	40429655	40429676	SBDH113-191172	FUS
hsa_circ_0000994	40429680	40429700	human_RBP_CLIPdb_18181862;GSE40653,GSM998875	FUS
hsa_circ_0000994	40429685	40429765	SBDH180-3236	AGO2
hsa_circ_0000994	40429700	40429720	human_RBP_CLIPdb_18181863;GSE68890,GSM1685421	MBNL2
